# Supplementary material for: Photophysical behavior of a new cholesterol attached coumarin derivative and fluorescence spectroscopic studies on its interaction with bile salt systems and lipid bilayer membranes
Source: Royal Society of Chemistry journal article supplement (doi:10.1039/c3cp53895h), 2013-11-11
Supplement: c3cp53895h.pdf [file c3cp53895h.pdf]

## Supporting Information

H. Surya Prakash Rao,<sup>a\*</sup> Avinash Desai,<sup>a</sup> Ivy Sarkar,<sup>b</sup> Monalisa Mohapatra,<sup>b</sup> Ashok Kumar Mishra<sup>b\*</sup>

<sup>a</sup> Department of Chemistry, Pondicherry University, Pondicherry – 605 014 INDIA

<sup>b</sup> Department of Chemistry, Indian Institute of Technology Madras, Chennai – 600 036 INDIA

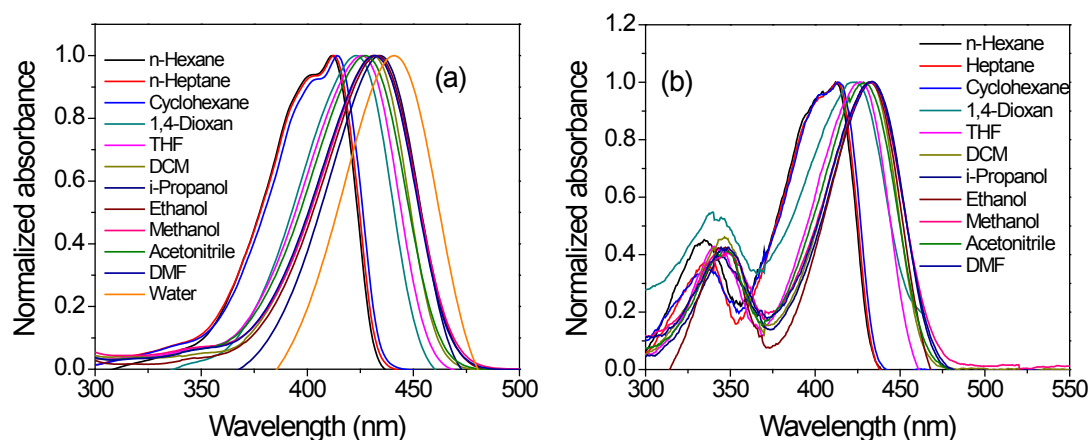

Figure S1: Normalized absorption spectra of (a) **Cum** and (b) **Cum-Chl** (except water) at 2.5  $\mu\text{M}$  in solvents of different polarity.

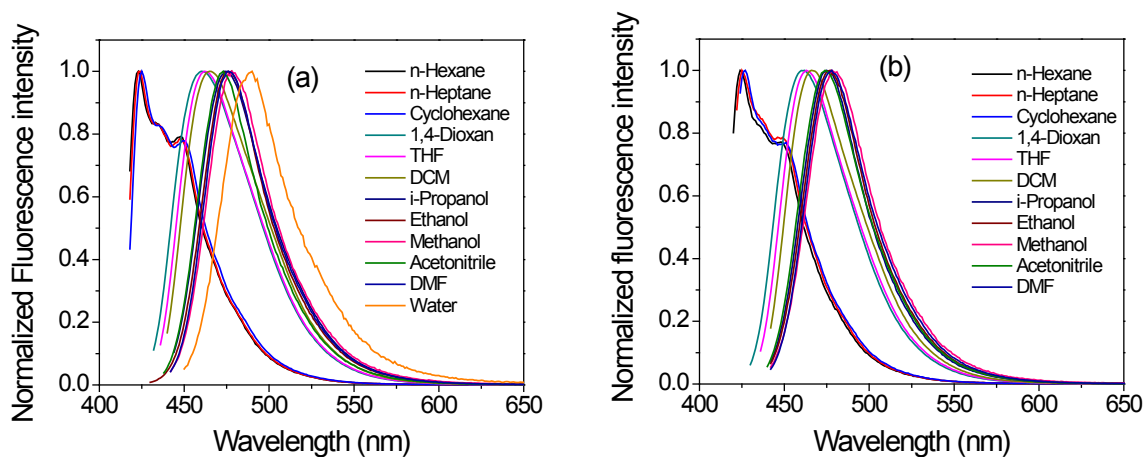

Figure S2: Normalized fluorescence spectra of (a) **Cum** and (b) **Cum-Chl** (longer wavelength excitation) (except water) at 2.5  $\mu\text{M}$  in solvents of different polarity.

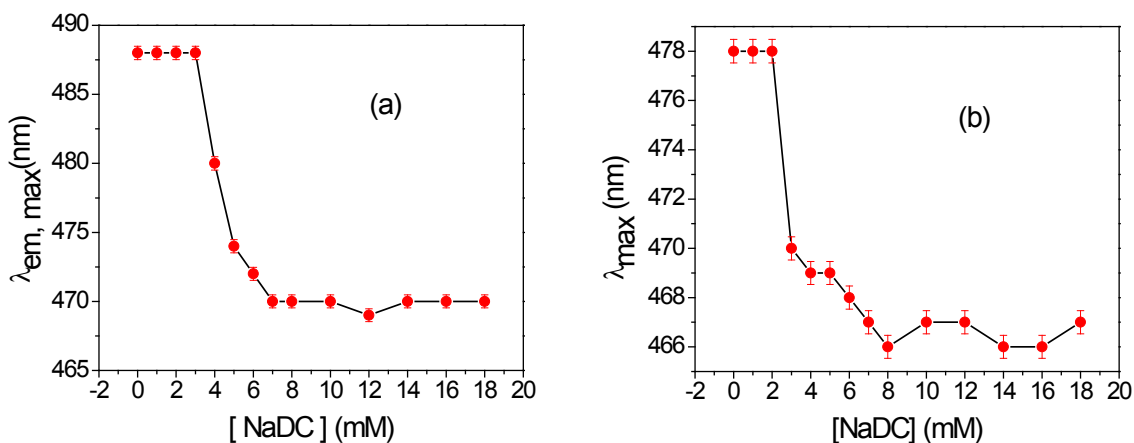

Figure S3: Blue shift of  $\lambda_{em, max}$  of (a) Cum and (b) Cum-Chl monomer in NaDC medium at  $\lambda_{ex}$  440 nm.

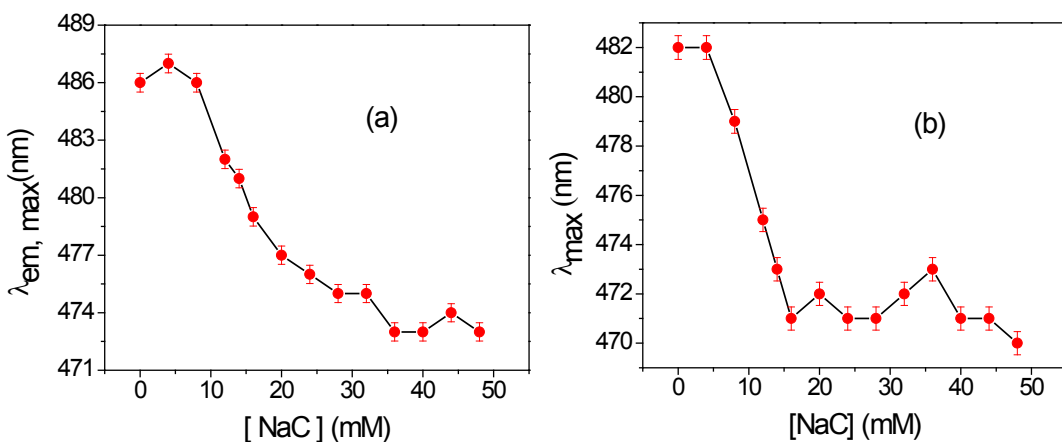

Figure S4: Blue shift of  $\lambda_{em, max}$  of (a) Cum and (b) Cum-Chl monomer in NaC medium at  $\lambda_{ex}$  440 nm.

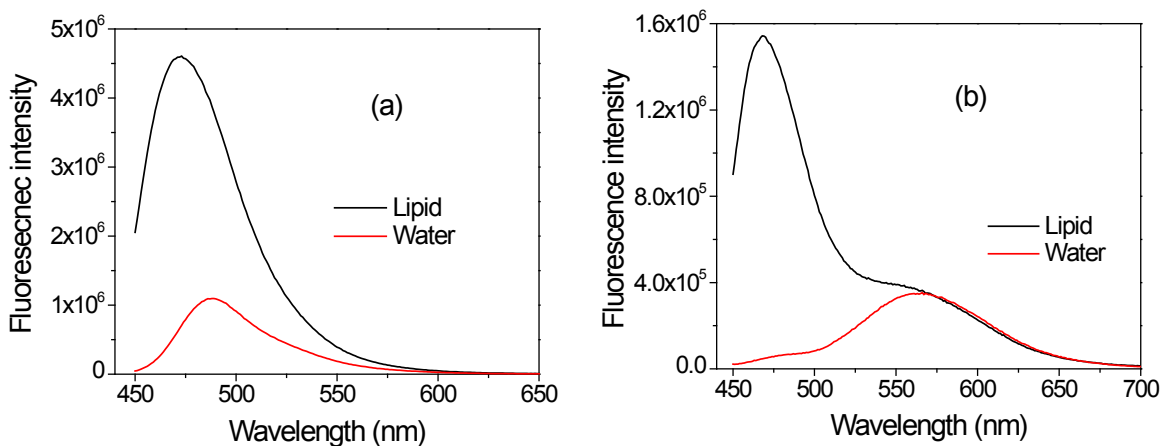

Figure S5: Fluorescence spectra of (a) **Cum** and (b) **Cum-Chl** at  $\lambda_{\text{ex}}$  440 nm in DMPC liposome and water at 21°C.

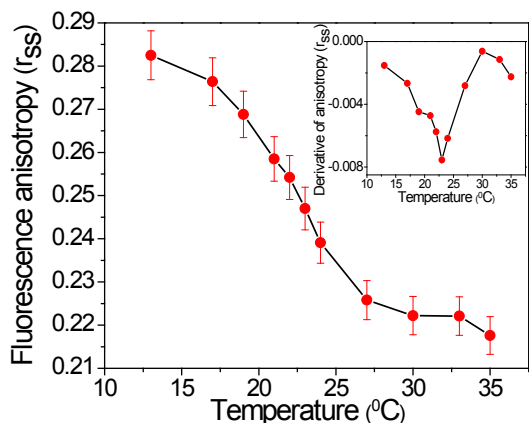

Figure S6: Drop in fluorescence anisotropy ( $r_{ss}$ ) of **Cum** with temperature ( $\lambda_{\text{ex}}$  440 nm,  $\lambda_{\text{em}}$  480 nm), inset shows its derivative plot.

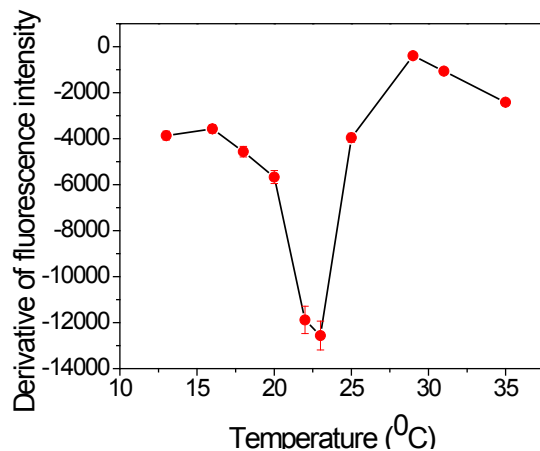

Figure S7: Derivative plot of fluorescence intensity of H-aggregates of **Cum-Chl** (2.5  $\mu\text{M}$ ) in DMPC liposome with temperature at  $\lambda_{\text{ex}}$  440 nm.

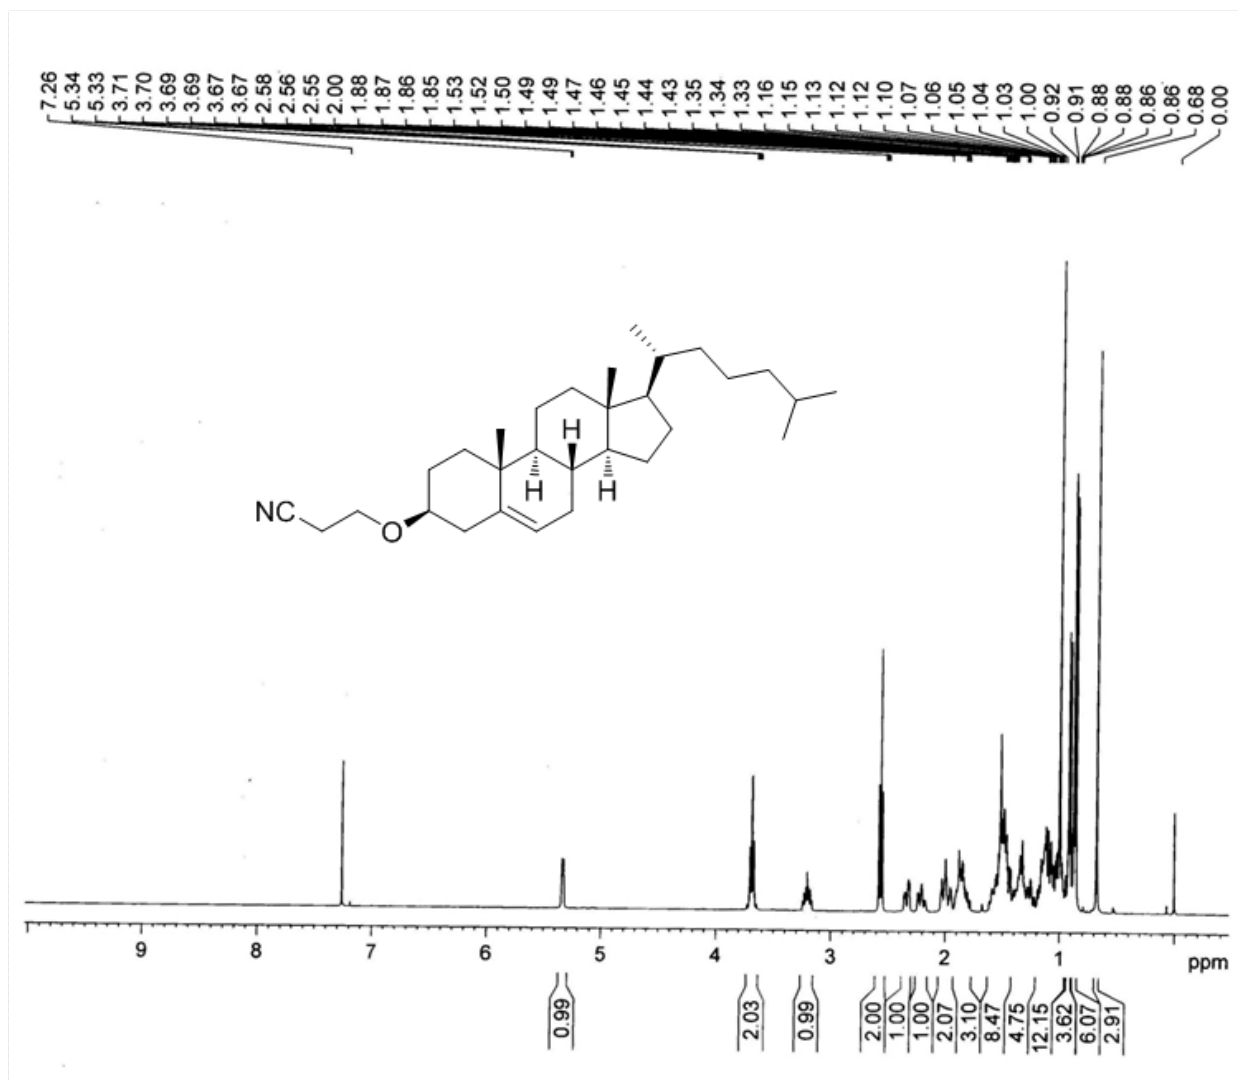

Figure S8; <sup>1</sup>H NMR (400 MHz, CDCl<sub>3</sub>) spectrum of 3-Cholesterylpropanenitrile 4

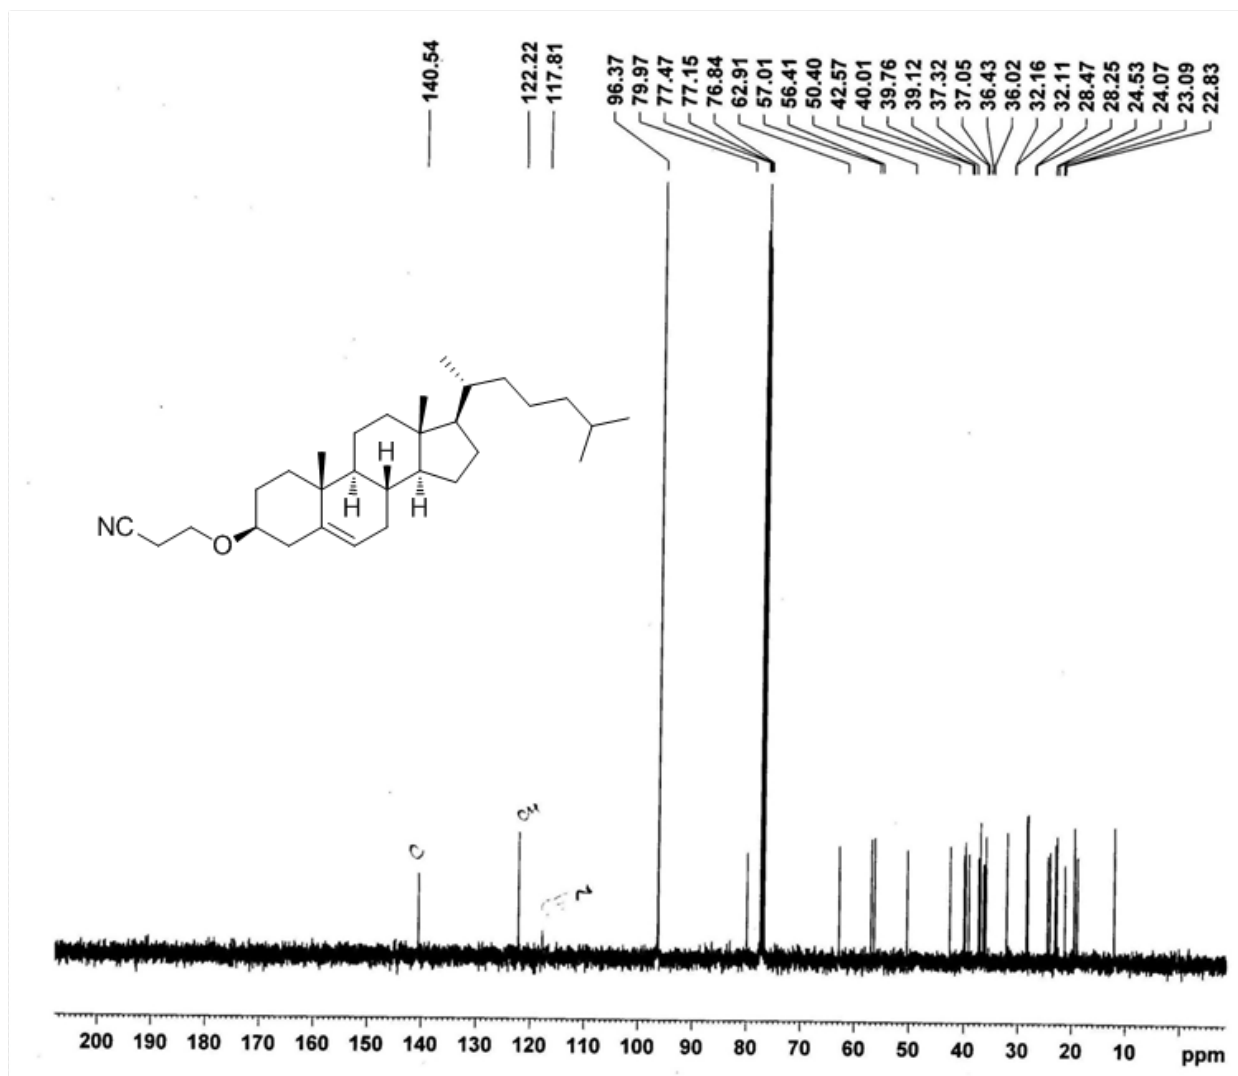

Figure S9; <sup>13</sup>C NMR (100 MHz, CDCl<sub>3</sub>) spectrum of 3-Cholesterylpropanenitrile 4

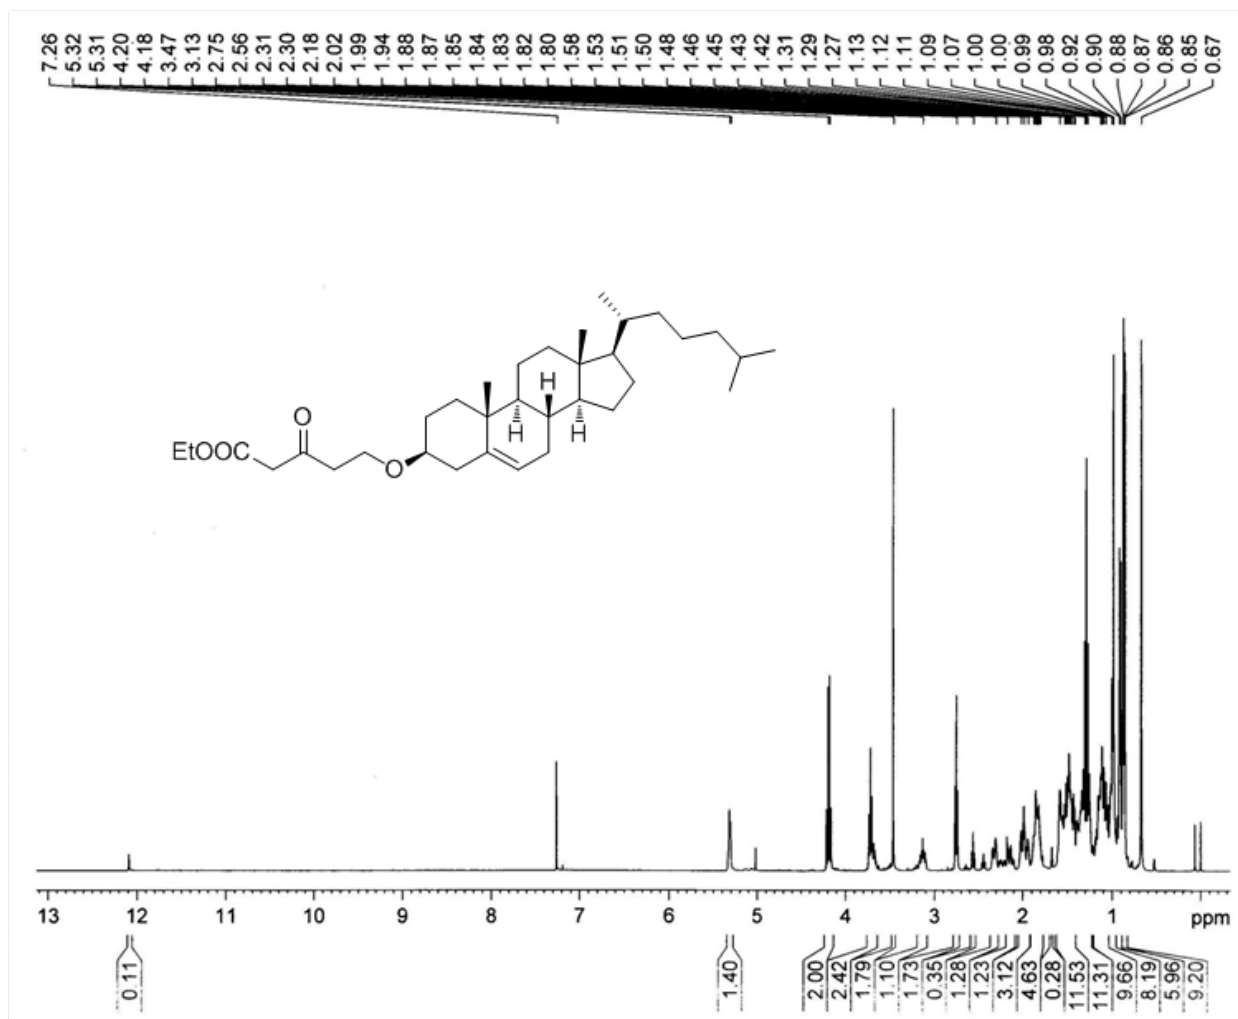

Figure S10; <sup>1</sup>H NMR (400 MHz, CDCl<sub>3</sub>) spectrum of Ethyl 5-(3-cholesteryl)-3-oxopentanoate 5

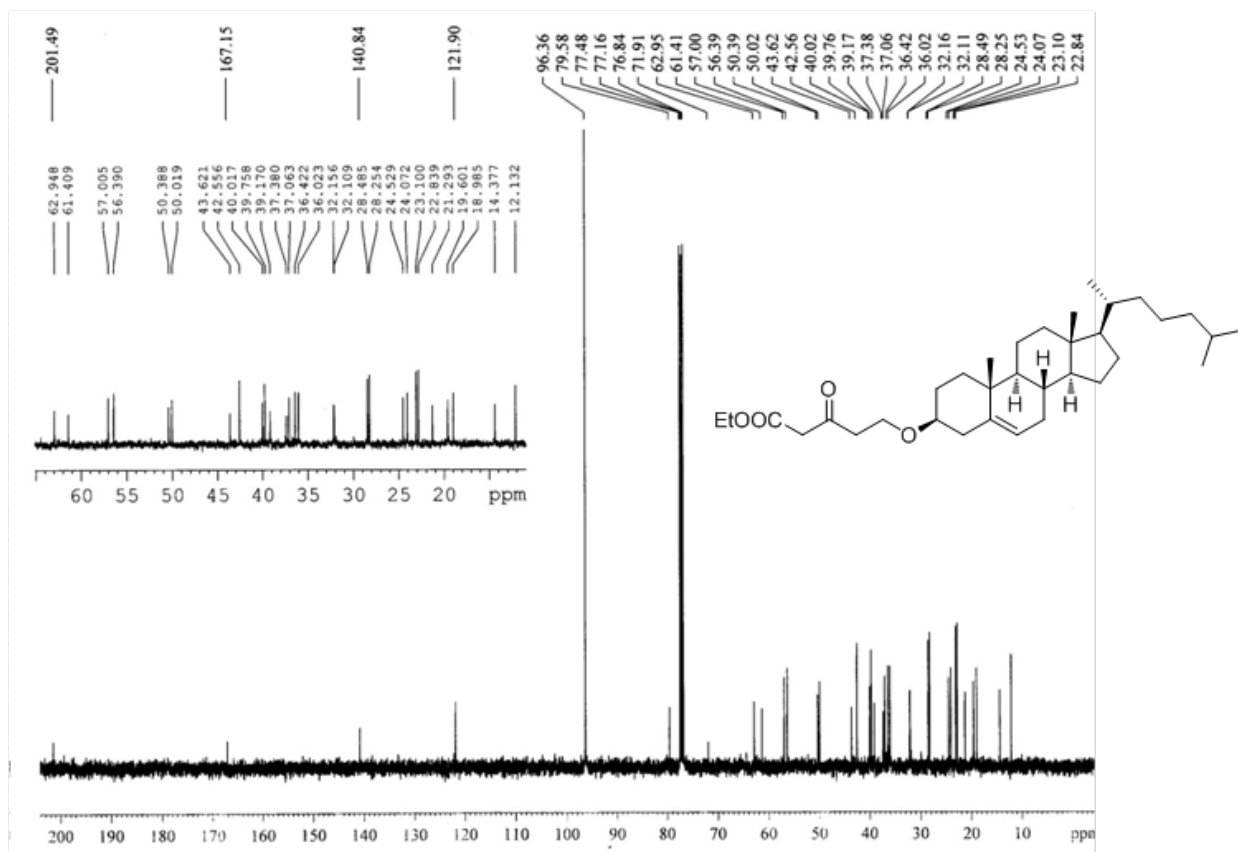

Figure S11;  $^{13}\text{C}$  NMR (100 MHz,  $\text{CDCl}_3$ ) spectrum of Ethyl 5-(3-cholesteryl)-3-oxopentanoate 5

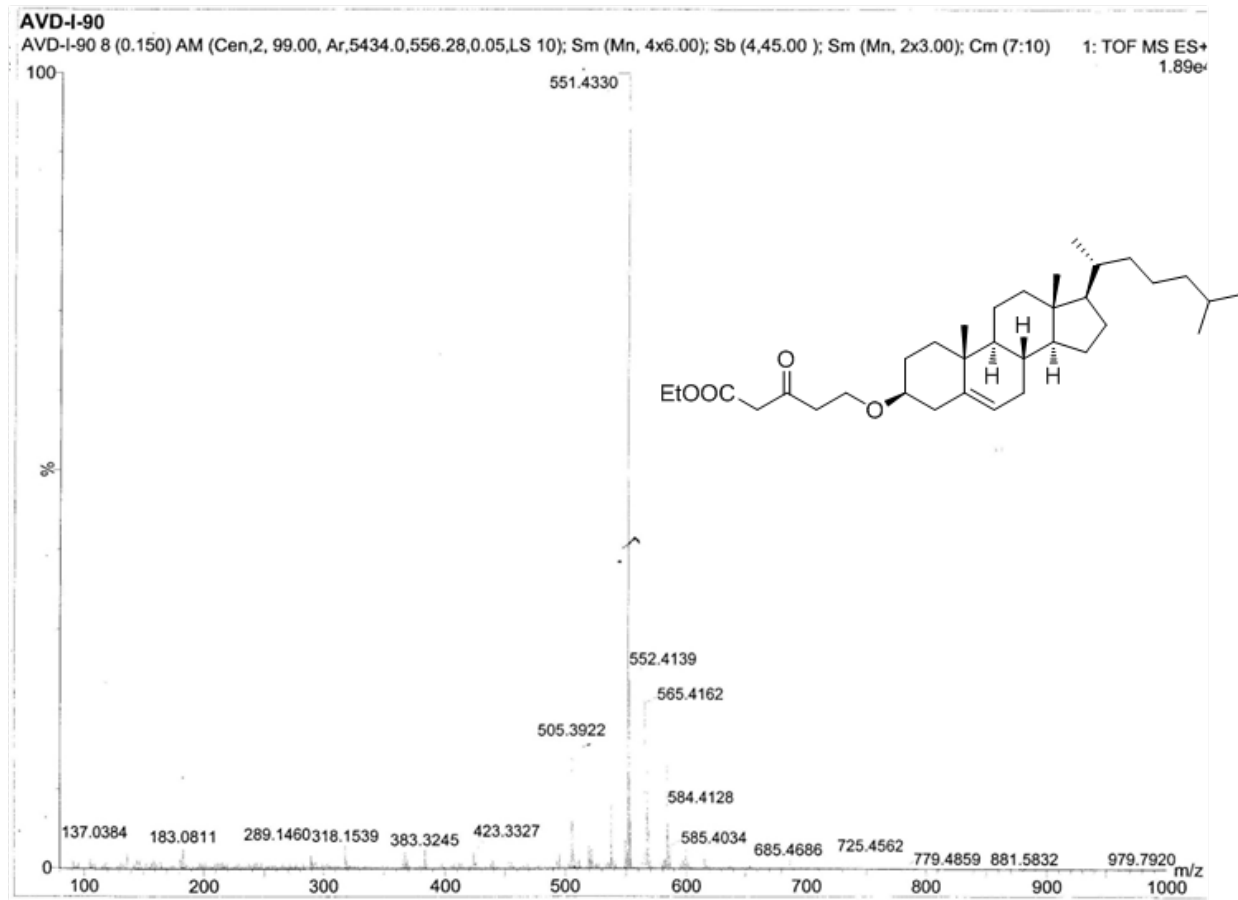

Figure S12; HRMS Spectrum of Ethyl 5-(3-cholesteryl)-3-oxopentanoate 5



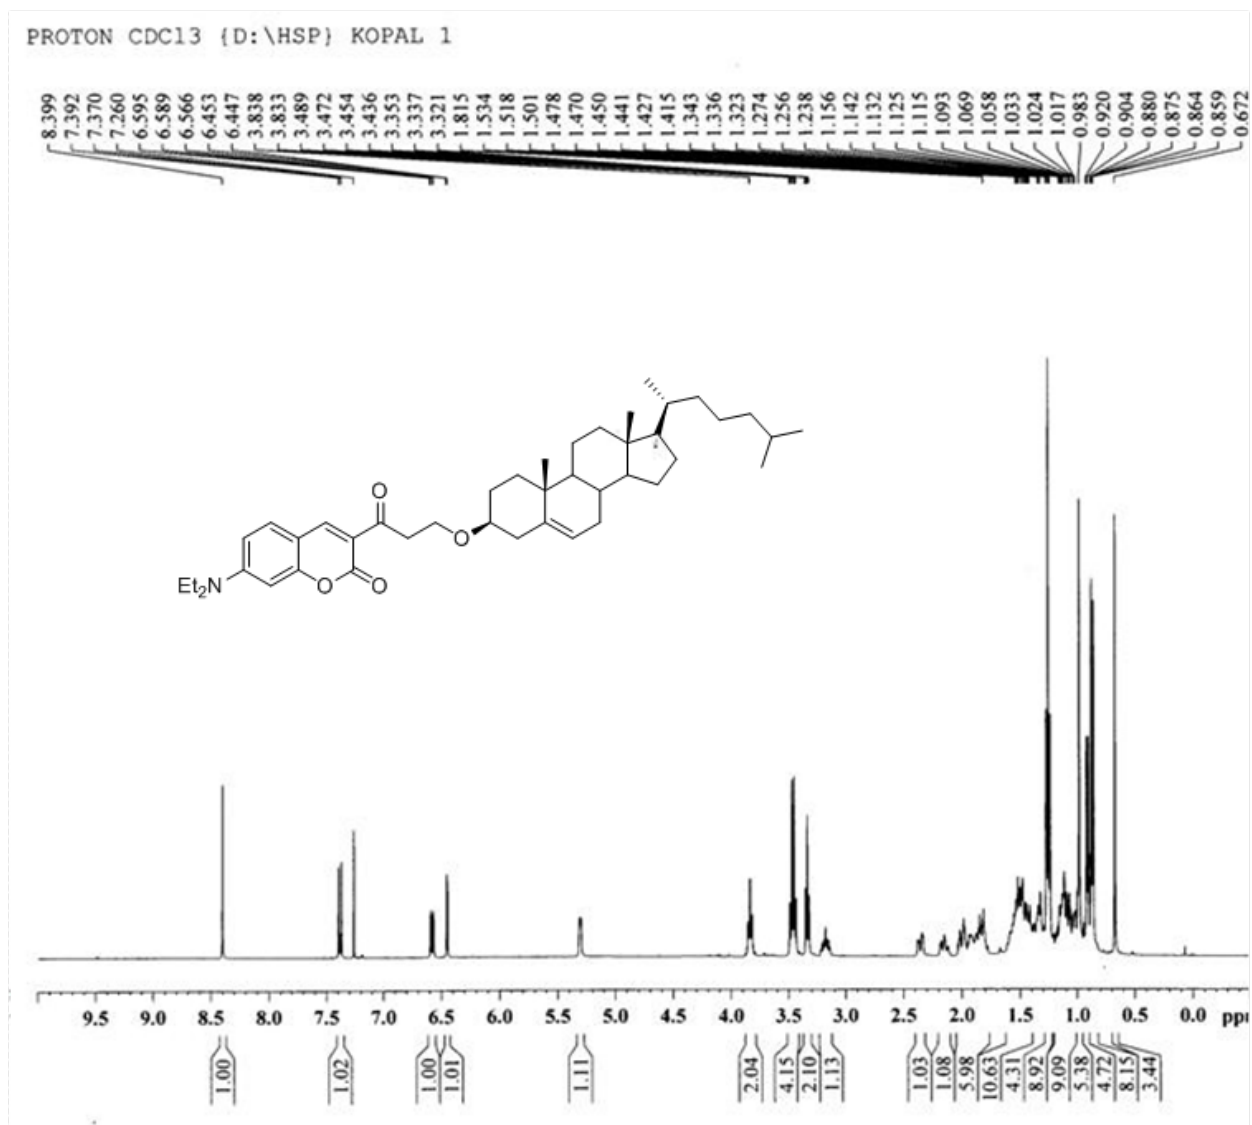

Figure S13;  $^1\text{H}$  NMR (400 MHz,  $\text{CDCl}_3$ ) spectrum of 7-(Diethylamino)-3-(3-cholesteryl)propanoyl)-2H-chromen-2-one 2

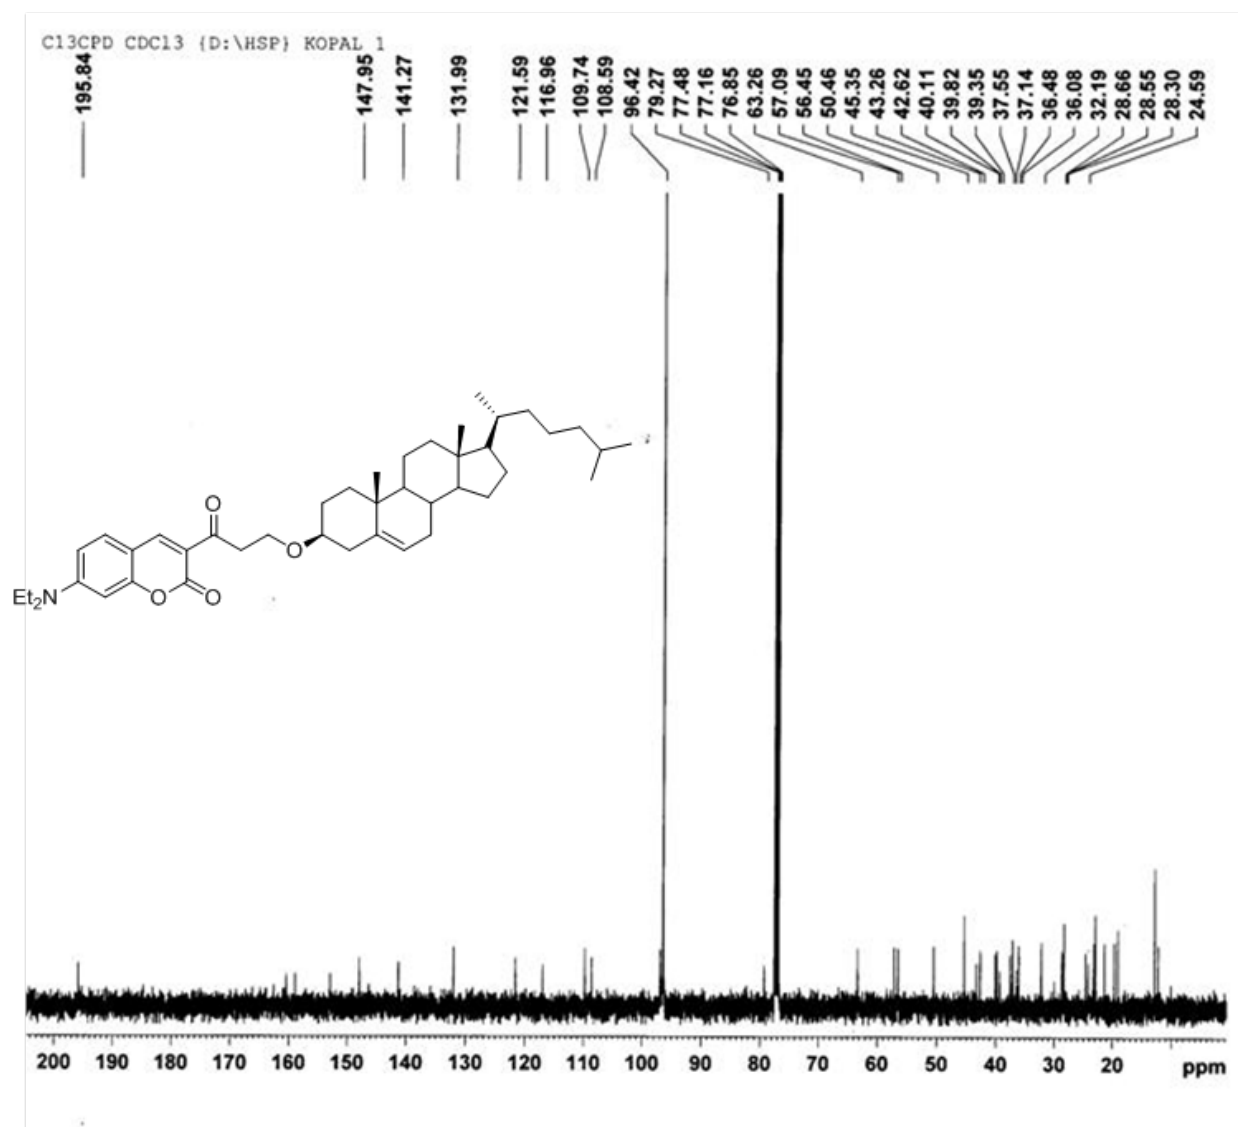

Figure S14;  $^{13}\text{C}$  NMR (100 MHz,  $\text{CDCl}_3$ ) spectrum of 7-(Diethylamino)-3-(3-cholesteryl)propanoyl-2H-chromen-2-one 2

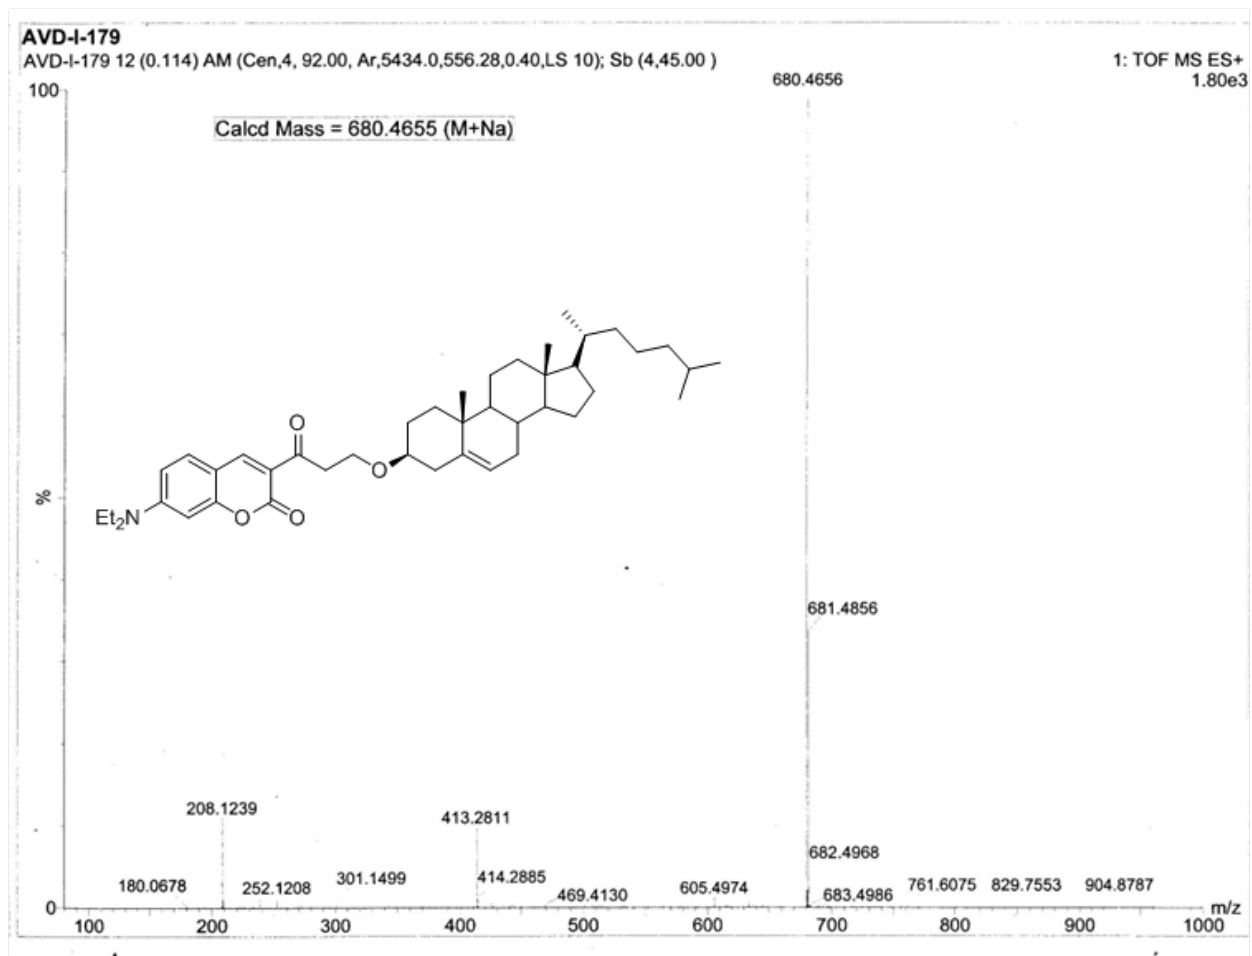

Figure S15; HRMS Spectrum of 7-(Diethylamino)-3-(3-cholesteryl)propanoyl)-2H-chromen-2-one 2
